# Supplementary material
Source: MDPI journal article supplement (https://www.mdpi.com/2227-9717/3/1/1)
Supplement: s1 [file s1]

## Supplementary Information

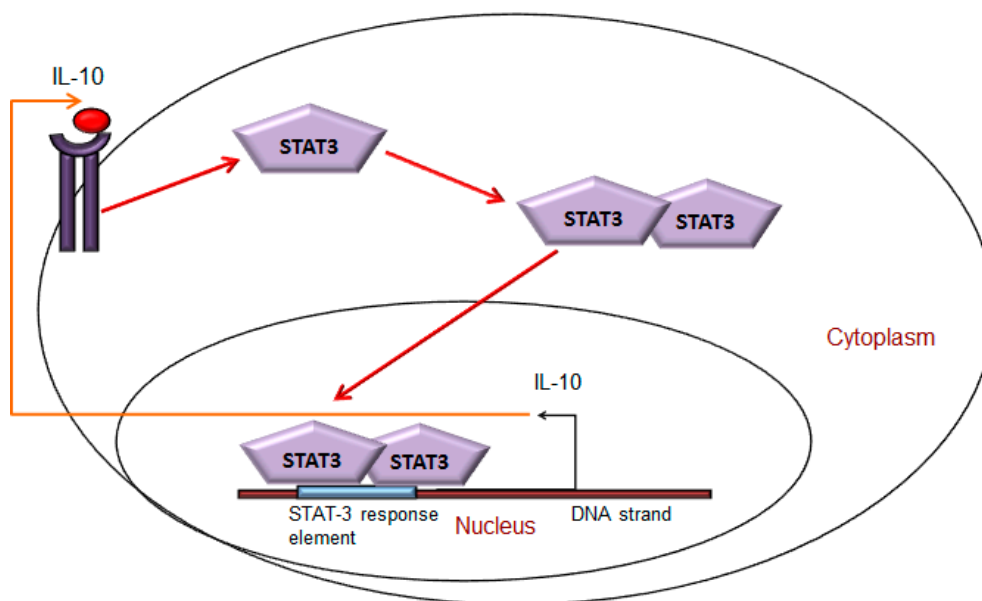

**Figure S1.** Schematic representation of STAT3 signal transduction pathway under LPS induced *de novo* IL-10 stimulation and feed forward regulation in macrophages.

© 2014 by the authors; licensee MDPI, Basel, Switzerland. This article is an open access article distributed under the terms and conditions of the Creative Commons Attribution license (<http://creativecommons.org/licenses/by/4.0/>).
